# Supplementary material for: Generating ring-shaped engineered heart tissues from ventricular and atrial human pluripotent stem cell-derived cardiomyocytes
Source: PubMed Central journal article supplement (PMC6946709; doi:10.1038/s41467-019-13868-x), 2020-01-07
Supplement: 41467_2019_13868_MOESM1_ESM.pdf [file 41467_2019_13868_MOESM1_ESM.pdf]

**SUPPLEMENTARY INFORMATION**

**Generating Ring-Shaped Engineered Heart Tissues from Ventricular and  
Atrial Human Pluripotent Stem Cell-Derived Cardiomyocytes**

I. Goldfracht et al.

## Supplementary Figures

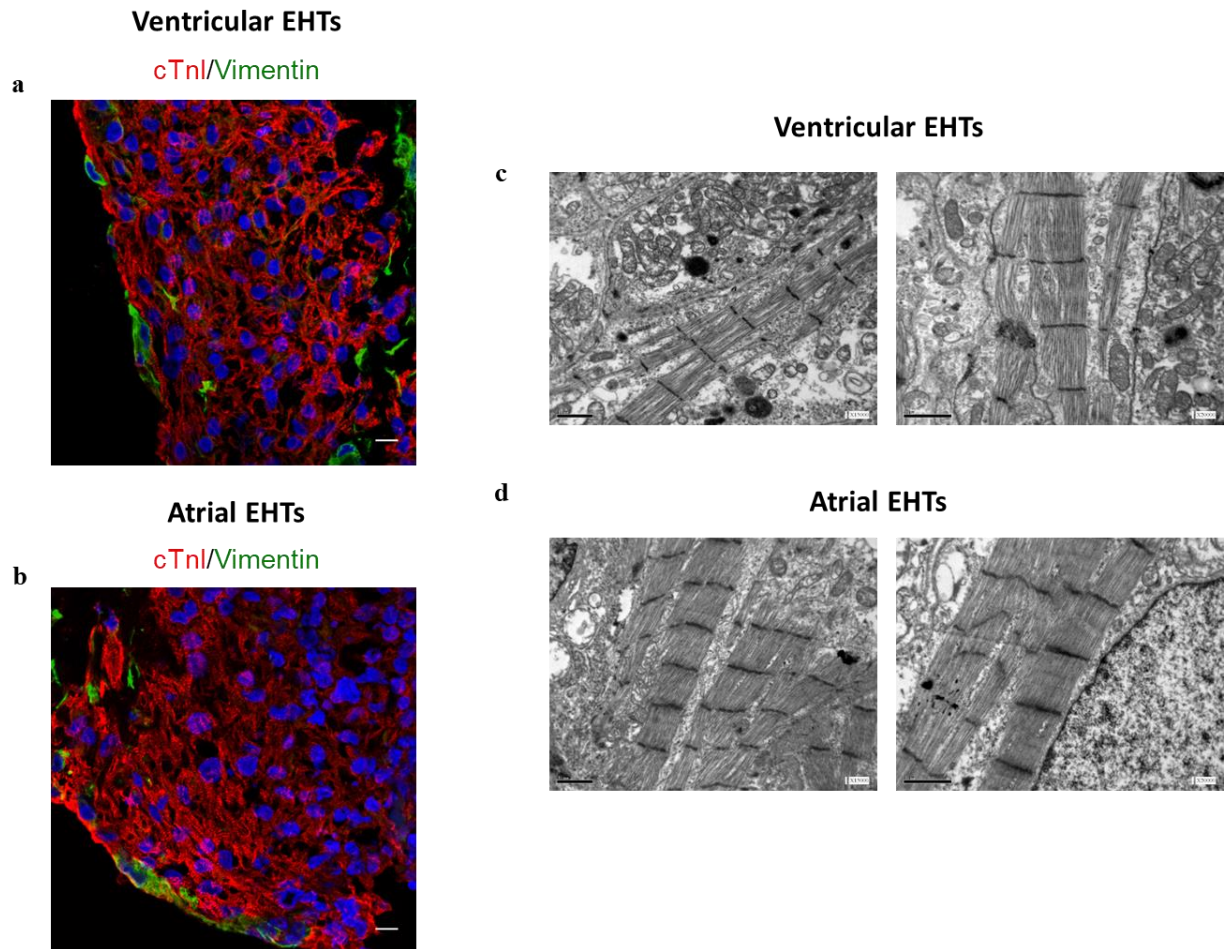

**Fig. 1. Ultrastructural characterization of the chamber-specific EHTs.**

**a-b** Co-immunostaining of 30d ventricular (**a**) and atrial (**b**) EHTs for cTnI with the fibroblast marker vimentin. Nuclei were stained with DAPI. Scale: 10 $\mu$ m. 8 images were like the image presented here, out of 9 experiments performed. **c-d** Transmission electron microscopy (TEM) images of the chamber-specific EHTs. Organized sarcomeres, Z-lines and mitochondria are noticeably present in both ventricular (**c**) and atrial (**d**) EHTs. Scale: 1 $\mu$ m. 39 images were like the image presented here, out of 50 experiments performed.

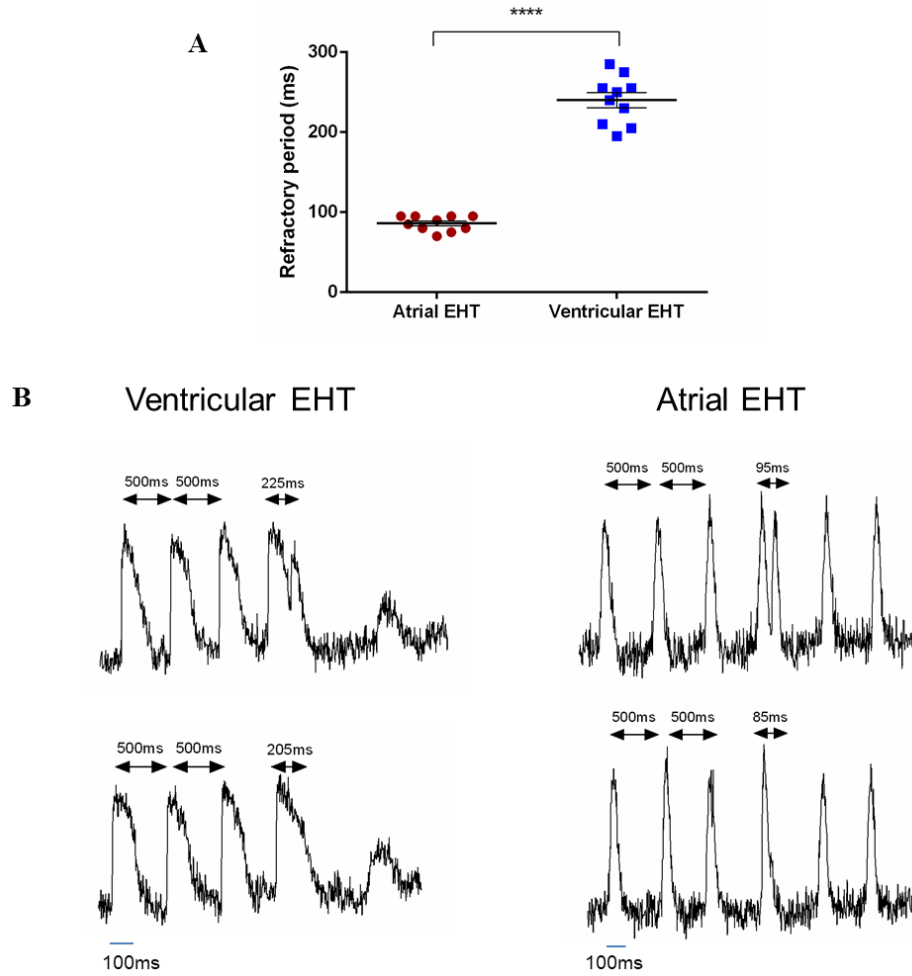

**Fig. 2. Refractory period of chamber-specific EHTs.**

**a** Refractory period of atrial and ventricular EHTs. \*\*\*\* $p < 0.0001$ , unpaired two-tailed t test,  $n = 10$ , biologically independent samples. Values are expressed as mean  $\pm$  SEM.

**b** Representative images showing action potential recordings of ventricular and atrial EHTs. The constructs were paced in 2 Hz for 10 sec and underwent a premature stimulation. In each chamber-specific EHT the last cycle length that resulted in AP stimulation is shown. In further decreasing of cycle length, no AP could be stimulated.

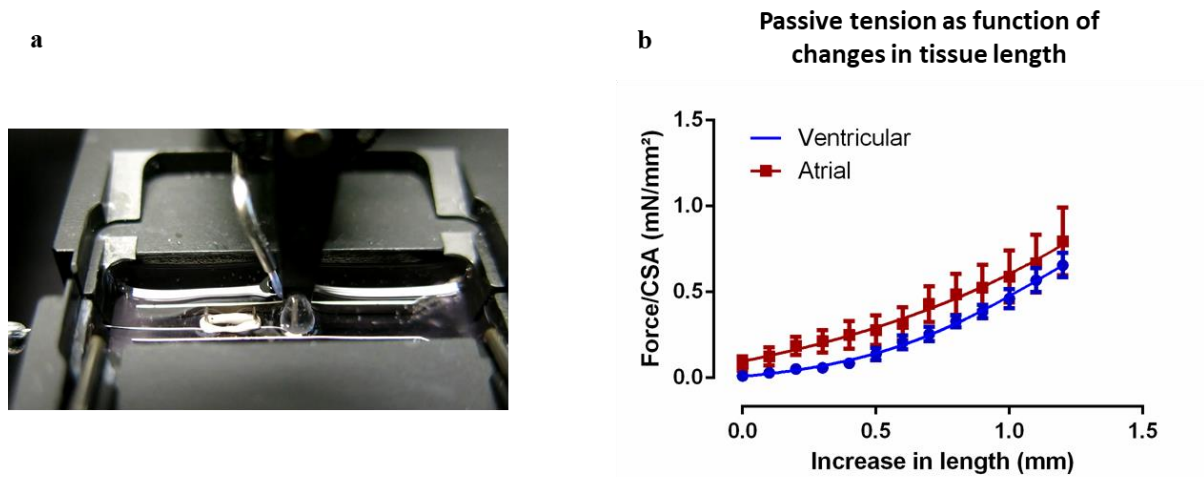

**Fig. 3: Passive tension in the chamber-specific EHTs.**

**a** Representative image of the EHT in the experimental setup used for gradual stretching of the tissues and for measurements of the generated passive and active forces. **b** Passive tension measurements of the atrial and ventricular EHTs, normalized to cross sectional area (CSA) and plotted against the change in length ( $n = 6$ , biologically independent samples). Values are expressed as mean $\pm$ SEM.

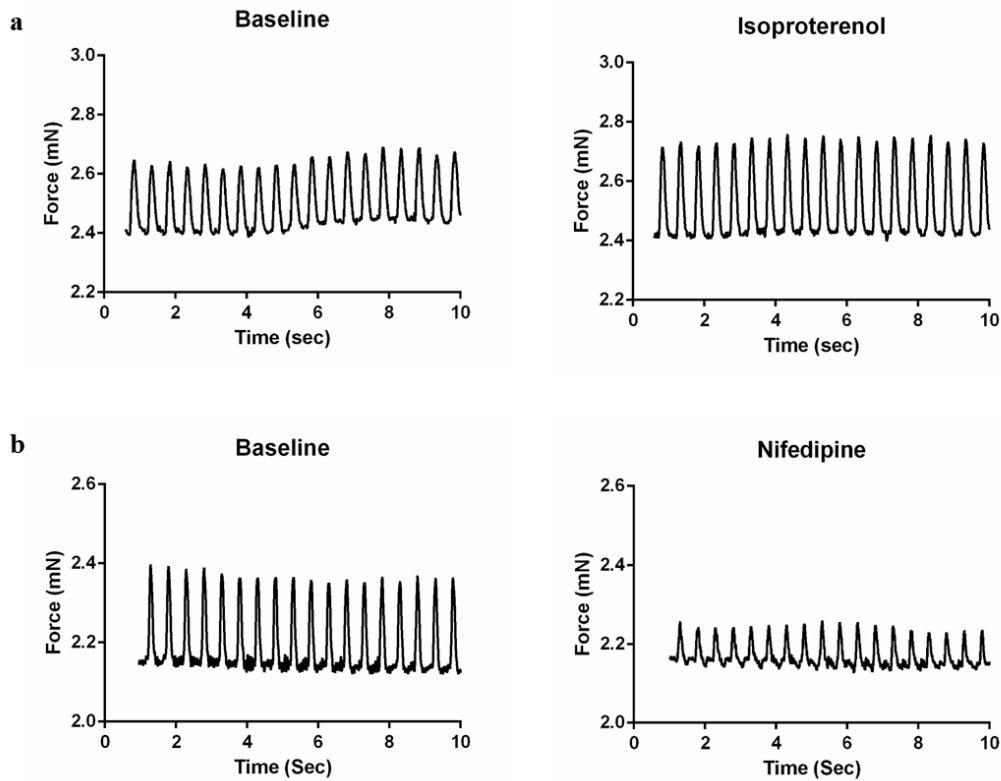

**Fig. 4. Pharmacological effects on contractile force measurements in the atrial EHTs.**

**a-b** Examples of measured contraction forces of the atrial-EHTs following application of 10  $\mu$ M of isoproterenol (**a**) or of 0.1  $\mu$ M nifedipine (**b**). Note the resulting positive and negative inotropic effects respectively. All recordings were performed at a stimulation frequency of 2 Hz.

**Supplementary Table 1: Primers used for qPCR gene expression analysis**

| <b>Primer set (all human)</b> | <b>Primer</b> | <b>Sequence (5'-3')</b>   |
|-------------------------------|---------------|---------------------------|
| GAPDH                         | Fwd           | CAGCCTCAAGATCATCAGCAATG   |
|                               | Rev           | CCATCCACAGTCTTCTGGGTG     |
| NPPA                          | Fwd           | ACAGGATTGGAGCCCAGAG       |
|                               | Rev           | GGAGCCTCTTGCAGTCTGTC      |
| KCNA5                         | Fwd           | CTGCTCATCTTCTTCCTCTTCATCG |
|                               | Rev           | TCAGGGATGCTAGAGAAATGGGTTC |
| KCNJ3                         | Fwd           | GCACGCGGTGATCTCCATGA      |
|                               | Rev           | ACCCTCAGGTGTCTGCCGA       |
| MYL7                          | Fwd           | AGGAGTTCAAAGAAGCCTTCAGCT  |
|                               | Rev           | AGCATGGCGTCCAGCTCCTC      |
| NR2F2                         | Fwd           | AGCAAGTGGAGAAGCTCAAGGC    |
|                               | Rev           | TGGGCTACATCAGAGAGACCAC    |
| GJA5                          | Fwd           | AGATCATCTTCGTCTCCACGCC    |
|                               | Rev           | CGGGTACTCGTAAGAGCCAGAG    |
| MYL2                          | Fwd           | TCTGAGAGACACCTTTGCTGCC    |
|                               | Rev           | GGGTCCGCTCCCTTAAGTTTCT    |
| GJA1                          | Fwd           | AGATGAGCAGTCTGCCTTTCGT    |
|                               | Rev           | TGAGCCAGGTACAAGAGTGTGG    |
| MYH7                          | Fwd           | AAAGAGGCGCTAGAGAAGTCCG    |
|                               | Rev           | CAGCATCTGCCAGGTTGTCTTG    |
| TNNT2                         | Fwd           | CTGGCCATTGACCACCTGAATG    |
|                               | Rev           | CTGCTGCTTGA ACTTCTCCTGC   |
| HEY2                          | Fwd           | CTGAGTTGAGAAGACTTGTGCCAA  |
|                               | Rev           | TGGCAAGAGCGTGTGCGTCAA     |
| KCNJ2                         | Fwd           | AACAGTGCAGGAGCCGCTTT      |
|                               | Rev           | ATCCACCGCCAGCGAATGTC      |

| <b>Primer set (all human)</b> | <b>Primer</b> | <b>Sequence (5'-3')</b> |
|-------------------------------|---------------|-------------------------|
| TNNT1                         | Fwd           | GATCTGCGGGCCAACCTCAA    |
|                               | Rev           | GTCGGAGACTTGGCGGCAT     |
